1 RESEARCH ARTICLE

2 **Compositionally distinct nuclear pore complexes of functionally**  
3 **distinct dimorphic nuclei in ciliate *Tetrahymena***

4

5 Masaaki Iwamoto<sup>1</sup>, Hiroko Osakada<sup>1</sup>, Chie Mori<sup>1</sup>, Yasuhiro Fukuda<sup>2</sup>, Koji Nagao<sup>3</sup>,  
6 Chikashi Obuse<sup>3</sup>, Yasushi Hiraoka<sup>1,4,5</sup> and Tokuko Haraguchi<sup>1,4,5,\*</sup>

7

8 <sup>1</sup>Advanced ICT Research Institute, National Institute of Information and  
9 Communications Technology (NICT), Kobe 651-2492, Japan.

10 <sup>2</sup>Graduate School of Agriculture, Tohoku University, Osaki, Miyagi 989-6711, Japan.

11 <sup>3</sup>Graduate School of Life Science, Hokkaido University, Sapporo 001-0021, Japan.

12 <sup>4</sup>Graduate School of Frontier Biosciences, Osaka University, Suita 565-0871, Japan.

13 <sup>5</sup>Graduate School of Science, Osaka University, Toyonaka 560-0043, Japan.

14

15 \*Author for correspondence: [tokuko@nict.go.jp](mailto:tokuko@nict.go.jp)

16

17

18 **RUNNING TITLE:** *Tetrahymena* nuclear pore complex

19

20 **KEY WORDS:** FG-Nup, Nuclear dimorphism, Nuclear envelope, Nucleoporin,  
21 Y-complex

22

23 **SUMMARY STATEMENT:** Our study demonstrates compositional and structural  
24 differences of the nuclear pore complex between the functionally differentiated  
25 macronucleus and micronucleus within a single cytoplasm of ciliated protozoa.

26 **ABSTRACT**

27 The nuclear pore complex (NPC), a gateway for nucleocytoplasmic trafficking, is  
28 composed of about 30 different proteins called nucleoporins. It remains unknown  
29 whether the NPCs within a species are homogeneous or vary depending on the cell type,  
30 or physiological condition. Here, we present evidence for compositionally distinct NPCs  
31 that form within a single cell in a binucleated ciliate. In *Tetrahymena thermophila*, each  
32 cell contains both a transcriptionally-active macronucleus (MAC) and a germline  
33 micronucleus (MIC). By combining *in silico* analysis, mass spectrometry analysis for  
34 immuno-isolated proteins, and subcellular localization analysis of GFP fused proteins,  
35 we identified numerous novel components of MAC and MIC NPCs. Core members of the  
36 Nup107-160 scaffold complex were enriched in MIC NPCs. Strikingly, two paralogs of  
37 Nup214 and of Nup153 localized exclusively to either MAC or MIC NPCs. Furthermore,  
38 the transmembrane components Pom121 and Pom82 localize exclusively to MAC and  
39 MIC NPCs, respectively. Our results argue that functional nuclear dimorphism in ciliates  
40 is likely to depend on compositional and structural specificity of NPCs.

## 41 INTRODUCTION

42 Ciliated protozoa maintain two distinct nuclei within the same cytoplasm: a somatic  
43 macronucleus (MAC) and a germline micronucleus (MIC) (Fig. 1A) (Eisen et al., 2006;  
44 Orias et al., 2011; Karrer, 2012). The polyploid MAC is transcriptionally active, and its  
45 acentromeric chromosomes segregate during cell division by a spindle-independent  
46 amitotic process. In contrast, the diploid MIC has transcriptionally inert, centromeric  
47 chromosomes that segregate by canonical mitosis. In *Tetrahymena thermophila*, DNA  
48 replication in the MIC and MAC occurs during non-overlapping periods in the cell cycle.  
49 Thus, nuclear dimorphism in ciliates involves non-equivalent regulation of multiple  
50 activities in two distinct nuclei (Orias, 2000; Goldfarb and Gorovsky, 2009). This is  
51 likely to require targeted transport of components to the MIC vs. MAC, for which  
52 differences in the NPCs may be important determinants.

53 Previously, we analyzed 13 *Tetrahymena* nucleoporins (Nups), and discovered that  
54 four paralogs of Nup98 were differentially localized to the MAC and MIC (Iwamoto et al.,  
55 2009). The MAC- and MIC-specific Nup98s are characterized by Gly-Leu-Phe-Gly  
56 (GLFG) and Asn-Ile-Phe-Asn (NIFN) repeats, respectively, and this difference is  
57 important for the nucleus-specific import of linker histones (Iwamoto et al., 2009). The  
58 full extent of compositional differentiation of MAC and MIC NPCs could not, however,  
59 be assessed, since only a small subset of the expected NPC components were detected.

60 NPCs have been studied in eukaryotes including rat (Cronshaw et al., 2002),  
61 *Saccharomyces cerevisiae* (Rout et al., 2000), *Aspergillus nidulans* (Osmani et al., 2006),  
62 *Schizosaccharomyces pombe* (Asakawa et al., 2014), *Arabidopsis thaliana* (Tamura et al.,  
63 2010), and *Trypanosoma brucei* (Degrasse et al., 2009; Obado et al., 2016) (Table S1).  
64 The NPC structure has an 8-fold rotational symmetry, and is made up of roughly 30  
65 known Nups organized into subcomplexes (Alber et al., 2007; Bui et al., 2013) (Fig. S1).  
66 The Nup93 complex in mammalian cells (Nic96 in *S. cerevisiae*) forms a stable scaffold  
67 composed of Nup93<sup>ScNic96</sup>, Nup205<sup>ScNup192</sup>, Nup188<sup>ScNup188</sup>, Nup155<sup>ScNup170 or ScNup157</sup>, and  
68 Nup53/Nup35/MP-44<sup>ScNup53 or ScNup59</sup> (Grandi et al., 1997; Hawryluk-Gara et al., 2005;  
69 Amlacher et al., 2011). A second stable scaffold in mammals, the Nup107-160 complex  
70 (called the Y-complex or Nup84 complex in *S. cerevisiae*) is composed of conserved  
71 subunits Nup107<sup>ScNup84</sup>, Nup160<sup>ScNup120</sup>, Nup133<sup>ScNup133</sup>, Nup96<sup>ScNup145C</sup>, Nup85<sup>ScNup85</sup>,  
72 Seh1, and Sec13, together with species-specific subunits (Siniosoglou et al., 1996;

73 Lutzmann et al., 2002; Loiodice et al., 2004). Peripheral to the scaffolds are Phe-Gly (FG)  
74 repeat-bearing Nups, whose disordered FG-repeat regions constitute the central channel,  
75 with FG repeats interacting with nuclear transport receptors (Terry and Wentle, 2009).  
76 Three transmembrane (TM) Nups anchoring the NPC to the mammalian nuclear  
77 membrane are NDC1, gp210, and POM121 (Greber et al., 1990; Hallberg et al., 1993;  
78 Stavru et al., 2006) (in yeast: Ndc1, Pom152, and Pom34 (Winey et al., 1993; Wozniak et  
79 al., 1994; Miao et al., 2006)). A distinct nucleoplasmic basket is formed with  
80 Tpr<sup>ScMip1/Mip2</sup> (Cordes et al., 1997; Strambio-de-Castillia et al., 1999).

81 Based on prior analysis, *T. thermophila* appeared to lack homologs of many widely  
82 conserved NPC components. These included scaffold Nups (mammalian Nup205, 188,  
83 160, 133, 107, 85, and 53, among others) from the Nup93 and Y-complexes. Similarly,  
84 homologs of FG-Nups Nup214, 153, 62, and 58 were also not detected, as were TM Nups  
85 except for gp210. These NPC components may have evaded homology-based searches  
86 due to extensive sequence divergence, given the large evolutionary distance between  
87 ciliates and animals, fungi, and plants.

88 To address these ambiguities and to better understand NPC differentiation in *T.*  
89 *thermophila*, we attempted comprehensive identification of Nups. First, we analyzed  
90 proteins affinity-captured with known Nups. Furthermore, we mined updated genome  
91 and protein databases for characteristic Nup sequences or conserved domains, using *in*  
92 *silico* structure prediction. The resulting expanded catalog of *Tetrahymena* Nups,  
93 combined with localization data, sheds new light on the extent to which NPC architecture  
94 can vary within a single species, and even in a single cytoplasm.

95

## 96 RESULTS

### 97 The Nup93 complex includes a unique Nup205 ortholog and a novel central 98 channel FG-Nup

99 In mammalian cells, the Nup93 complex (Fig. 1B) is composed of Nup93, Nup205,  
100 Nup188, Nup155, and Nup53 (Fig. S1) (Grandi et al., 1997; Hawryluk-Gara et al., 2005).  
101 In *Tetrahymena*, we previously identified homologs for Nup93 (*Tt*Nup93; Gene Model  
102 identifier TTHERM\_00622800) and Nup155 (*Tt*Nup155; TTHERM\_00760460), and  
103 found them distributed to MAC and MIC NPCs (Iwamoto et al., 2009). To identify other  
104 Nup93 complex components, we used mass spectrometry to analyze anti-GFP

105 immunoprecipitates from *Tetrahymena* expressing GFP-*TtNup93* (Fig. 1C). All of the  
106 proteins listed in Table S2 as ‘hypothetical protein’ were examined by Blast search for  
107 similarities to known Nups of other species. In addition, all of the ‘hypothetical proteins’  
108 were examined by expression profile analysis in the *Tetrahymena* Functional Genomics  
109 Database (TetraFGD) web site (<http://tfgd.ihb.ac.cn/>) (for details see the “Microarray”  
110 page of the TetraFGD: <http://tfgd.ihb.ac.cn/tool/exp> (Miao et al., 2009)) (also see  
111 Materials and Methods). When either the Blast search or the expression profile analysis  
112 (details described below) found similarities to any known Nups, we examined its  
113 subcellular localization in *T. thermophila* by ectopically expressing GFP fused proteins.  
114 By these analyses we found Nup308 (TTHERM\_00091620) and the novel protein  
115 TTHERM\_00194800 (*TtNup58*: Nup58 in Fig. 1D and Table S2).

116 Nup308, a protein of 2675 amino acid residues, was previously identified as a  
117 *Tetrahymena*-specific Nup, but it was not assigned to a subcomplex (Iwamoto et al.,  
118 2009). Based on PSIPRED analysis, Nup308 is composed of GLFG repeats forming an  
119 N-terminal disordered structure (residues 1–570), followed by a large C-terminal  
120  $\alpha$ -helix-rich region (residues 571–2675) (Fig. 2). To identify potential Nup308  
121 counterparts, we looked for Nups in other species with similar distributions of secondary  
122 structures. Interestingly, a large  $\alpha$ -solenoid domain is a predicted feature of both Nup205  
123 and Nup188, conserved core members of the Nup93 complex (Kosova et al., 1999;  
124 Andersen et al., 2013), although these proteins do not have FG repeats.

125 To investigate whether this structural similarity between *Tetrahymena* Nup308 and  
126 Nup205 and Nup188 homologs in other species reflected shared evolutionary origins, we  
127 performed a phylogenetic analysis. Nup308 formed a clade with Nup205 orthologs,  
128 supported by a bootstrap probability of 72%, but not with Nup188 orthologs (Fig. S2).  
129 Nup188 appears absent in *Tetrahymena*, since we failed to find any candidates in either  
130 the database or in our mass spectrometry data. Taken together, our results strongly  
131 suggest that Nup308 belongs to the Nup93 complex and is orthologous to human Nup205,  
132 but has acquired an unusual GLFG repeat domain. Consistent with this assignment,  
133 GFP-Nup308 localized similarly to GFP-*TtNup93*, being equally distributed between  
134 MAC and MIC NPCs (Iwamoto et al., 2009).

135 The second Nup candidate identified in *TtNup93* pulldowns was  
136 TTHERM\_00194800. This small protein (45 kDa deduced molecular weight) is

137 composed of an N-terminal FG-repeat region and a C-terminal coiled-coil region (Fig. 2),  
138 which are characteristics of central channel FG-Nups that are tethered by Nup93 (Chug et  
139 al., 2015). The secondary structure characteristics of the novel *Tetrahymena* Nup are  
140 highly similar to those of Nup62 and Nup58, central channel proteins in yeast and  
141 vertebrates that interact with Nup93 (Grandi et al., 1993, 1997). Because another protein  
142 was found as an Nup62 ortholog (described below), this protein is the likely *Tetrahymena*  
143 ortholog of Nup58; therefore, we named it *TtNup58* (Nup58 in Fig. 1D,E).

144

### 145 **Newly identified members of the Y-complex are likely homologs of** 146 **conserved Nups**

147 The vertebrate's Y-complex (Fig. 3A) contains 10 distinct proteins (Orjalo et al., 2006;  
148 Mishra et al., 2010), of which 3 had identified homologs in *Tetrahymena* (*TtSeh1*,  
149 *TtSec13*, *TtNup96*) (Iwamoto et al, 2009). To investigate whether the remaining seven  
150 are present in *Tetrahymena* but had been overlooked due to sequence divergence, we  
151 carried out mass spectrometric analysis of anti-GFP immunoprecipitates from cells  
152 expressing the known Y-complex GFP-tagged Nups described below.

153 First, in precipitates of GFP-*TtSeh1*, we identified an 86 kDa protein orthologous to  
154 Nup85 (Table S3) with a short stretch of four predicted  $\beta$ -strand blades at the N-terminus  
155 followed by an  $\alpha$ -solenoid domain (Fig. 2). That architecture is typical of Nup85  
156 orthologs that are Y-complex components in other organisms (Brohawn et al., 2008). We  
157 therefore tentatively named the *Tetrahymena* protein *TtNup85*. GFP-*TtNup85* localized  
158 to NPCs in both the MAC and MIC (Figs 3B and S3A).

159 We then immunoprecipitated GFP-*TtNup85*, and identified two novel candidate  
160 Y-complex core members. Both proteins are composed of a  $\beta$ -strand-rich N-terminal half  
161 and an  $\alpha$ -helical-rich C-terminal half. This domain architecture is characteristic of the  
162 Y-complex components Nup160 and Nup133 (Berke et al., 2004; Devos et al., 2004), and  
163 we tentatively named the *Tetrahymena* proteins *TtNup160* and *TtNup133* (Fig. 2 and  
164 Table S4). GFP-*TtNup160* and GFP-*TtNup133* localized to NPCs in both nuclei, like  
165 other Y-complex components (Figs 3B and S3A).

166 Another conserved Y-complex component is Nup107, which interacts with Nup96.  
167 To search for the *Tetrahymena* homolog we used GFP-*TtNup96* as bait and identified a

168 109 kDa protein (Table S5) that is rich in predicted  $\alpha$ -helices like human Nup107 (Fig. 2).  
169 The protein, tentatively named *TiNup107*, localized as a GFP-tagged construct to NPCs  
170 of both nuclei (Figs 3B and S3A).

171 The genes encoding all members of the Y-complex except for Nup96 are  
172 co-expressed and exhibit sharp expression peaks at 2 h (C-2) after two cell strains with  
173 different mating-types were mixed for conjugation (for details see the “Microarray” page  
174 of the TetraFGD: <http://tfgd.ihb.ac.cn/tool/exp> (Miao et al., 2009)) (Fig. 3C). In contrast,  
175 *TiNup96* exhibits an expression peak at 4 h (C-4). This difference in the timing of  
176 expression between *TiNup96* and the other Y-complex components may be related to a  
177 unique aspect of *TiNup96* gene structure: *TiNup96* is expressed as part of a single  
178 transcription unit together with *MicNup98B*, under the promoter of the *MicNup98B* gene  
179 (Iwamoto et al., 2009).

180 Three other components of the human Y-complex were not detected in our studies:  
181 Nup43, Nup37, and ELYS. These components may be species-specific (Bilokapic and  
182 Schwartz, 2012; Rothballer and Kutay, 2012), and genuinely absent from *Tetrahymena*.  
183 They are also absent from *S. cerevisiae* (Alber et al., 2007) (see Table S1), supporting this  
184 idea.

185

### 186 **Y-complex components show biased localization to the MIC**

187 As previously reported, GFP-tagged Nup93 complex members and some of the central  
188 channel Nups (*TiNup93*, *TiNup308*, and *TiNup54*) were distributed equally between  
189 MAC and MIC NPCs, judging by fluorescence intensities (Iwamoto et al., 2009). In  
190 striking contrast, all Y-complex components so far identified exhibit distinctively biased  
191 localization to the MIC nuclear envelope (NE) compared to the MAC NE (Fig. 3B).  
192 Fluorescence intensities in the MIC were 2.69–3.96 times higher than those in the MAC  
193 (Fig. 3B). This biased localization of Y-complex components may be caused by  
194 overexpression of the components due to ectopically expressing the GFP-tagged proteins  
195 in addition to the expression of endogenously untagged ones. To address this issue, we  
196 examined the localization of Nup160-GFP, Nup133-GFP, and Seh1-mCherry expressed  
197 from endogenous loci under the control of their native promoters, and therefore expressed  
198 at physiological levels. All three proteins showed biased localization, as found for the  
199 overexpressed GFP-tagged proteins (compare the images in Fig. 3B and Fig. S3B),



200 suggesting that the biased localization is not caused by overexpression of the tagged  
201 proteins. Because the NPC density is similar in the MAC and MIC (Fig. S1 in Iwamoto et  
202 al. (2009)), the relative concentration of Y-complex components in the MIC NE suggests  
203 that the Y-complex is present at higher copy number per NPC in the MIC compared to the  
204 MAC (Fig. 3D).

205

### 206 **Newly-detected FG-Nups include nucleus-specific and common** 207 **components**

208 FG-Nups were originally characterized as nucleoporins with domains containing  
209 extensive repeats of phenylalanine-glycine (FG) that function in nucleocytoplasmic  
210 transport. More recently, we reported a remarkable difference in MAC and MIC NPCs  
211 regarding the repeat signature present in four Nup98 paralogs. The repeat signature of  
212 MacNup98A and -B is mostly GLFG, while that of MicNup98A and -B is mostly NIFN  
213 (Fig. 2) (Iwamoto et al., 2009; 2010; 2015). We have now taken advantage of the recently  
214 improved annotation of the *Tetrahymena* Genome Database Wiki  
215 (<http://ciliate.org/index.php/home/welcome>), to search for sequences bearing repeats that  
216 are similar to those of FG-Nups in other species. We found five candidate FG-Nups.  
217 Based on the molecular size and the positions of predicted  $\alpha$ -helices,  $\beta$ -strands, and  
218 FG-repeat regions, we designated four of these proteins as MicNup214  
219 (TTHERM\_00992810), MacNup214 (TTHERM\_00755929), MicNup153  
220 (TTHERM\_00647510), and MacNup153 (TTHERM\_00379010): GFP-fusions of  
221 MicNup214 and MacNup214 were exclusively localized to the MIC and MAC,  
222 respectively (Fig. 4A,B). Fluorescent protein (GFP or mNeon)-fusions of MicNup153  
223 were mostly localized to the MIC and secondarily to the MAC in most growing cells (Fig.  
224 4A), although it was exclusively localized to the MIC in some cells (Fig. S3C).  
225 GFP-fusions of MacNup153 were exclusively localized to the MAC (Fig. 4B). The  
226 localization of the fifth candidate FG-Nup (*Tt*Nup62: Nup62 in Fig. 4C), like the novel  
227 nucleoporin *Tt*Nup58 (Nup58 in Fig. 4C) identified as a central channel protein  
228 (discussed above), was less specific.

229 A striking feature of the Nup214 paralogs is that they contain the same  
230 nucleus-specific repeat motifs described earlier for *Tt*Nup98 paralogs. Like the  
231 MIC-specific Nup98 paralogs, MicNup214 contains NIFN repeats (the last N is mostly Q

232 in this protein), while MacNup214 contains FG repeats (Fig. 2). This difference may be  
233 an important determinant for selective protein transport to the MAC and MIC, as  
234 previously shown for *TtNup98s* (Iwamoto et al., 2009). We note that MacNup214 lacks a  
235  $\beta$ -strand-rich N-terminal region that is found in other Nup214 orthologs (Weirich et al.,  
236 2004; Napetschnig et al., 2007) (Fig. 2).

237 In contrast, MicNup153 and MacNup153 do not differ markedly from one another in  
238 their molecular features (Fig. 2). Because the N-terminus domain of human Nup153 is  
239 involved in its NPC localization (Enarson et al., 1998), we speculate that the N-terminal  
240 domains of MicNup153 and MacNup153 may also be involved in their nucleus-specific  
241 localization in *Tetrahymena*. Further study is required to elucidate their nucleus-specific  
242 localization.

243 While the expression of this set of FG-Nups is upregulated during conjugation (Fig.  
244 4D), the MIC-specific components tend to be expressed 2 h earlier than MAC-specific  
245 ones. For example, MicNup214 expression peaks at 2 h in conjugation (C-2) vs.  
246 MacNup214 at C-4; similarly, MicNup153 peaks at C-6 vs. MacNup153 at C-8 (Fig. 4D).  
247 The earlier expression of MIC-specific components compared with MAC-specific ones  
248 may reflect a selective requirement for MIC-specific NPCs during early stages of  
249 conjugation, such as the crescent stage (Sugai and Hiwatashi, 1974). In contrast, the later  
250 expression of MAC-specific components probably reflects formation of the new MACs  
251 that occurs in the later stages of conjugation.

252 The fifth candidate FG-Nup identified by this screen was a 39 kDa protein  
253 (TTHERM\_01122680). This protein is composed of an N-terminal FG-repeat region and  
254 a C-terminal coiled-coil region with the characteristics of central channel FG-Nups and is  
255 assigned as a Nucleoporin NSP1/NUP62 family protein (IPR026010) (Fig. 2).  
256 Consequently, this protein is the likely *Tetrahymena* ortholog of Nup62; therefore, we  
257 named it *TtNup62*. The GFP-tagged protein was distributed to both nuclei (Nup62 in Fig.  
258 4C), similarly to the central channel Nups *TtNup58* (Figs 1E and 4C) and *TtNup54*  
259 (Iwamoto et al., 2009), although *TtNup62* was slightly enriched in the MAC NE, whereas  
260 *TtNup58* was slightly enriched in the MIC NE. The expression profile of *TtNup62* was  
261 similar to that of *TtNup58*, with an expression peak after 4 h of conjugation (C-4) (Fig.  
262 4D).

263 *Ti*Nup62 has relatively few repeats in its FG motif compared with homologs such as  
264 human Nup62 and *S. cerevisiae* Nsp1 (Fig. 2), although it has several FX repeats (X=N,  
265 Q, A or T in the case of this protein). A feature unique to *Tetrahymena* is the presence of  
266 GLFG repeats in Nup308, an ortholog of Nup205. The Nup93 complex containing  
267 Nup205 anchors Nup62 (Vollmer and Antonin, 2014), and it is likely that the  
268 *Tetrahymena* Nup93 complex containing Nup308 anchors *Ti*Nup62. Thus, we  
269 hypothesize that the GLFG repeats present in Nup308 compensate for the low number of  
270 FG repeats of *Ti*Nup62 presents in the central channel.

271

### 272 **Nup88, Nup185, and Tpr**

273 We used a variety of strategies to identify additional Nups. Homology searches against  
274 InterPro (<http://www.ebi.ac.uk/interpro/>) revealed a gene (TTHERM\_00455610) with a  
275 conserved Nup88 domain “*Ti*Nup88 (PTHR13257:SF0)” (Fig. 2) and an expression  
276 profile similar to those of some other *Tetrahymena* Nups (Fig. 5A). Localization of a  
277 GFP-fusion to NPCs was highly biased, albeit not exclusive, to the MAC (Fig. 5C). We  
278 therefore named this protein *Ti*Nup88, which is known to localize to the cytoplasmic side  
279 of the NPC in other species (Fig. 5B). As Nup88 in other species is known to interact with  
280 Nup214 and Nup98 (Fornerod et al., 1997), *Ti*Nup88 may contribute to the  
281 nucleus-specific localization of Nup214 and Nup98 paralogs.

282 TTHERM\_00755920 (encoding a 185 kDa protein), which lies adjacent to the open  
283 reading frame (ORF) of MacNup214, attracted our interest because its predicted  
284 molecular structure resembled those of large scaffold Nups such as Nup160, Nup155, and  
285 Nup133, and because its expression profile is similar to those of some other *Tetrahymena*  
286 Nups (Fig. 5A). A GFP-fusion localized to NPCs, with a bias to the MAC (Fig. 5D).  
287 Based on its predicted molecular weight, we named this protein Nup185. Nup185  
288 contains a conserved domain ‘Nucleoporin (SSF117289)’ (Fig. 2), which is generally  
289 found near the N-terminal regions of Nup155 and Nup133 homologs. The expression  
290 peak of Nup185 appeared at C-6 (Fig. 5A).

291 To assess the location of Nup185 within the NPC architecture, we identified  
292 interacting proteins by immunoprecipitating GFP–Nup185. One interacting protein was  
293 TTHERM\_00268040, which bears predicted coiled-coil motifs throughout its entire  
294 sequence (Fig. 2) and is thus similar to the nuclear basket component, Tpr (Fig. 5B).

295 THERM\_00268040 fused with GFP localized equivalently to MAC and MIC NPCs  
296 (Fig. 5E). This protein is a likely ortholog of human Tpr; therefore, we named it *TtTpr*.  
297 Nup185 did not interact with any members of the Y- or Nup93 complexes (Table S6).

298

### 299 **The transmembrane Nups Pom121 and Pom82 show nucleus-specific** 300 **localization**

301 Some but not all of the transmembrane (TM) Nups are conserved between vertebrates and  
302 yeasts: the former have POM121, gp210, and NDC1 (Cronshaw et al, 2002; Stavru et al,  
303 2006), while the latter have Pom34, Pom152, and Ndc1 (Rout et al, 2000; Asakawa et al,  
304 2014). The only reported TM Nup in *T. thermophila* is gp210 (Iwamoto et al., 2009).  
305 Because all *Tetrahymena* Nups identified so far have a similar expression pattern, in  
306 which a large expression peak appears during early conjugation stage (Figs 3C, 4C and  
307 5A), we used expression profiling and TM domain search to identify possible TM Nups  
308 in the updated TetraFGD and the TMHMM Server  
309 (<http://www.cbs.dtu.dk/services/TMHMM-2.0/>), respectively. Using this approach, we  
310 found two candidate TM Nups. Each has one TM domain and an FG-repeat region  
311 (“*TtPom121*” and “*TtPom82*” in Fig. 6A). Their expression profiles are shown in Fig. 6B.

312 One of the TM Nup candidates (THERM\_00312730; *TtPom121*) has an  
313 N-terminal TM domain and C-terminal FG repeats (Fig. 6A, middle) with a deduced  
314 molecular weight of 129 kDa. These attributes are very similar to those of vertebrate  
315 POM121 (compare top and middle parts of Fig. 6A) (Rothballer and Kutay, 2012).  
316 *TtPom121* fused with GFP at its C-terminus (*TtPom121*–GFP) localized specifically to  
317 MAC NPCs (Fig. 6C, upper). Consequently, this protein is the likely *Tetrahymena*  
318 ortholog to human POM121; therefore, we named it *TtPom121*.

319 Notably, when GFP was fused with the N-terminus of *TtPom121* at a region close to  
320 the TM domain (GFP–*TtPom121*), the tagged protein localized in the MAC nucleoplasm,  
321 but not in MAC NPCs or the MIC nucleoplasm (Fig. 6C, lower). This result suggests that  
322 *TtPom121* bears a MAC-specific nuclear localization signal (NLS) in its N-terminal  
323 region. Similarly, POM121 homologs in vertebrates have NLS sequences in the  
324 N-terminal region (Yavuz et al., 2010; Funakoshi et al., 2011).

325 In contrast, the other TM Nup candidate (THERM\_00375160; *TtPom82*) localized  
326 exclusively to MIC NPCs (Fig. 6D, upper). This protein has predicted molecular features

327 that have not been reported in Nups from any other organism: a TM domain near the  
328 C-terminus, central coiled-coil, and N-terminal FG repeats (Fig. 6A, bottom). We named  
329 this protein *TiPom82* according to its predicted molecular weight (82 kDa). A construct  
330 lacking the TM domain showed diffuse cytoplasmic localization (Fig. 6D, lower),  
331 suggesting that MIC NPC-specific localization of *TiPom82* does not depend on the  
332 MIC-specific nuclear transport of *TiPom82*. This result suggests that *TiPom121* and  
333 *TiPom82* use different mechanisms to target to the MAC and MIC NPCs.

334 Next, we performed immuno-electron microscopy (iEM) for the Pom proteins using  
335 anti-GFP antibody in order to know their sub-NPC localization. Intriguingly, their  
336 sub-NPC localizations were opposite; Pom121 was exclusively localized to the nuclear  
337 side of the MAC NPC (Fig. 6E), whereas Pom82 was exclusively localized to the  
338 cytoplasmic side of the MIC NPC (Fig. 6F).

339 Given the difference in molecular features, their behaviors when the TM domain  
340 function was disrupted, and their sub-NPC localizations, Pom121 and Pom82 are  
341 unlikely to be functional homologs of each other. Taken together, these findings lead to  
342 the conclusion that MAC and MIC NPCs contain distinct TM components (Fig. 6G,H).  
343 The protein components of MAC and MIC NPCs are summarized in Fig. 7.

344 One TM Nup, found in both fungi and animals but missing from our *Tetrahymena*  
345 catalog, is Ndc1. We identified a potential Ndc1 homolog in THERM\_00572170, a  
346 protein with six predicted TM domains that is co-transcribed with other Nups (see  
347 [http://tfgd.ihb.ac.cn/search/detail/gene/THERM\\_00572170](http://tfgd.ihb.ac.cn/search/detail/gene/THERM_00572170)). However, neither N- nor  
348 C-terminal GFP fusions of this protein localized to NPCs (Fig. S3D). Therefore,  
349 *Tetrahymena* NPCs may lack Ndc1. Similarly, Ndc1 has not been detected in  
350 *Trypanosoma* NPCs (Obado et al., 2016).

351

### 352 **The permeability of the nuclear pore differs between MAC and MIC**

353 To better understand the functional consequences of structural differences between MAC  
354 and MIC NPCs, we examined the relative pore exclusion sizes by asking whether probes  
355 of different sizes could gain access to each nucleoplasm. GFP (approx. 28 kDa) was  
356 excluded only from MICs, whereas GFP-GST (more than 100 kDa due to its  
357 oligomerization) was excluded from both MACs and MICs (Fig. S4A). In addition,  
358 FITC-dextran of 40 kDa could enter MACs, whereas 70-kDa FITC-dextran was

359 completely excluded (Fig. S4B). These results indicate that MAC pores exclude  
360 molecules greater than approximately 50 kDa, which is similar to the permeability size  
361 limit of nuclear pores in other species (Paine et al., 1975; Gorlich and Mattaj, 1996;  
362 Keminer and Peters, 1999). On the other hand, MIC pores impose a much smaller  
363 exclusion size, and exclude molecules of even 10–20 kDa (Fig. S4B). This difference in  
364 exclusion size may be due to differences between the protein composition and structural  
365 arrangement of NPCs of these dimorphic nuclei.

## 366 **DISCUSSION**

367 We have now identified 28 nucleoporins in the ciliate *T. thermophila*: 15 Nups reported  
368 here, and 13 in our previous study (Iwamoto et al., 2009). This total comprises 24  
369 different Nups for the MAC and MIC: this number includes 18 Nups commonly localized  
370 in both nuclei, 4 Nups with nucleus-specific homologues (Nup214, Nup153, Nup98A,  
371 and Nup98B), and *TtPom82* and *TtPom121*. This total is somewhat smaller than the  
372 roughly 30 Nups known in other eukaryotes, e.g. 34 in human and in *Drosophila*  
373 *melanogaster*, 27 in *Caenorhabditis elegans*, 33 in *S. pombe*, and 35 in *S. cerevisiae*  
374 (Rothballer and Kutay, 2012; Asakawa et al., 2014). The deficit in *T. thermophila* Nups is  
375 due to the absence of homologs for Nup358, GLE1, hCG1/Nup42, Nup43, Nup37,  
376 Centrin-2, Nup53, TMEM33, ELYS, and Aladin. Similarly, the protist *Trypanosoma*  
377 *brucei* is missing Nup358, GLE1, hCG1/Nup42, Nup37, Centrin-2, TMEM33, and ELYS,  
378 and 25 Nups in total have been identified by interactome analysis (DeGrasse et al, 2009;  
379 Obado et al., 2016). One conserved Nup identified in *Trypanosoma* but not *Tetrahymena*  
380 is Nup53 (*TbNup65* (XP\_822630.1)) (Obado et al., 2016). This raises the question of  
381 whether a *T. thermophila* Nup53 homolog eluded our search due to sequence or structural  
382 divergence. Alternatively, *T. thermophila* may have lost a Nup that is not essential for  
383 viability.

384

### 385 **A role of nucleus-specific Nups**

386 We previously reported that the GLFG-repeat and NIFN-repeat domains in MacNup98s  
387 and MicNup98s, respectively, are involved in the nucleus-specific transport of linker  
388 histones (histone H1 and MLH, respectively), arguing that these nucleus-specific Nups  
389 are determinants of nucleus-specific transport (Iwamoto et al., 2009). Importantly, we  
390 can now expand this argument, since our expanded catalog shows that all NPC subunits  
391 that are nucleus-specific are FG-Nups: Nup214, Nup153, Nup98 and Pom-s. Since the  
392 FG-repeats interact with nuclear transport receptors such as importin- $\beta$  family proteins  
393 (Allen et al., 2001; Isgro and Schulten, 2005; Liu and Stewart, 2005; Tetenbaum-Novatt  
394 et al., 2012), specificity for the MAC or MIC is likely to be determined in cooperation  
395 with importin- $\beta$ s. This idea is also supported by the presence of nucleus-specific importin  
396 family proteins (Malone et al., 2008).

397 It is interesting to note that both MAC- and MIC-specific Nups contain atypical  
398 repeat motifs: NIFN, but also more subtle variations on the FG-repeat: FN, FQ, FA, FS  
399 and so on (Fig. 2). Because the NIFN-repeat domain of MicNup98A is known to function  
400 in blocking misdirected nuclear transport of MAC-specific linker histones (Iwamoto et al.,  
401 2009), the atypical FG-repeats may similarly be involved in controlling nucleus-specific  
402 transport of particular proteins. However, importin- $\beta$ s that preferentially interact with the  
403 NIFN-repeat and their cargos have not been found, and thus the complete role of the  
404 NIFN-repeat motif in nucleus-specific transport remains to be elucidated.

405

#### 406 **A role of biased Nups to build different NPC structures**

407 The nucleus-specific Nups generate obvious structural differences between MAC and  
408 MIC NPCs. However, these different components have to be integrated into two NPC  
409 scaffold structures that are constructed of the same components. One way to make  
410 different structures from the same components may be to incorporate different amounts  
411 of these components, leading to different structures that allow biased  
412 localization/assembly of nucleus-specific components. The localization of the  
413 Y-complex (Fig. 3B) and Nup88 (Fig. 5C) was highly biased to either MICs or MACs,  
414 respectively. Thus, these biased components may be critical for directing assembly of  
415 MAC- or MIC-type NPCs. Consistent with this idea, Nup98 homologs in vertebrates  
416 interact with the Y-complex components Nup96 (Hodel et al., 2002) and Nup88 (Griffis  
417 et al., 2003). This model raises the question of how structurally similar paralogs in  
418 *Tetrahymena* can differentially recruit nucleus-specific FG-Nups.

419 The copy number of the Y-complex within individual NPCs differs between the  
420 MAC and MIC (Fig. 3B,D), indicating that at least two NPC structures with different  
421 Y-complex stoichiometries can form in ciliates. This quantitative difference in  
422 Y-complex incorporation may be directed by membrane Nups. The nucleus-specific TM  
423 Nups, Pom121 and Pom82, are currently strong candidates for initiating NPC assembly  
424 on the nuclear membrane. In vertebrates, Pom121 binds the Y-complex through a  
425 Nup160 homolog (Mitchell et al., 2010). In *Tetrahymena*, *TrPom121* and *TrPom82* may  
426 differentially affect Y-complex integration into MAC or MIC NPCs. This model can be  
427 extended to biased integration of Nup98 paralogs, since Pom121 has been shown to  
428 directly bind Nup98 (Mitchell et al., 2010), supporting our idea that biased Nups and



429 nucleus-specific Nup98 paralogs cooperate to build two distinct NPCs. In this model, the  
430 acquisition of specialized Pom proteins might have been one of the most crucial  
431 evolutionary events for generating nuclear dimorphism in ciliates. Taken overall, our  
432 study contributes to understanding the diversity of NPC architectures in eukaryotes,  
433 including potential functional and evolutionary aspects.

## 434 **MATERIALS AND METHODS**

### 435 ***In silico* genomic database analysis and secondary structure prediction**

436 We searched for candidates Nups using protein BLAST on the NCBI website and  
437 *Tetrahymena* Genome Database Wiki (<http://ciliate.org/index.php/home/welcome>)  
438 (Eisen et al., 2006; Stover et al., 2012). Expression profiles based on microarray data  
439 (<http://tfgd.ihb.ac.cn/tool/exp>) were obtained from the TetraFGD (<http://tfgd.ihb.ac.cn/>)  
440 (Miao et al., 2009). We identified the candidate proteins as Nups when the expression  
441 profile satisfied two conditions: First, the amount of expression is lower in vegetative  
442 stages than in conjugation stages. Second, expression peaks appear in between C-2 and  
443 C-8 stages of conjugation. Secondary structures and transmembrane domains were  
444 predicted by PSIPRED (<http://bioinf.cs.ucl.ac.uk/psipred/>) and the TMHMM Server  
445 (<http://www.cbs.dtu.dk/services/TMHMM-2.0/>), respectively. Coiled-coil regions were  
446 predicted by PBIL Coiled-Coils prediction  
447 ([https://npsa-prabi.ibcp.fr/cgi-bin/npsa\\_automat.pl?page=npsa\\_lupas.html](https://npsa-prabi.ibcp.fr/cgi-bin/npsa_automat.pl?page=npsa_lupas.html)) or SIB  
448 COILS ([http://embnet.vital-it.ch/software/COILS\\_form.html](http://embnet.vital-it.ch/software/COILS_form.html)). Conserved domains were  
449 searched for using InterPro (<http://www.ebi.ac.uk/interpro/>).

450

### 451 **DNA construction**

452 cDNAs were amplified by PrimeSTAR reagent (Takara, Kyoto, Japan) from the reverse  
453 transcripts prepared from the total RNA fraction of vegetative or conjugating cells as  
454 described previously (Iwamoto et al., 2009). The cDNAs were digested with *Xho*I and  
455 *Apa*I, and cloned into the pIGF1 vector to ectopically express them as N-terminal  
456 GFP-tagged proteins (Malone et al., 2005). The pIGF1C vector with the multi-cloning  
457 site at the 5' site of the GFP-coding sequence was generated by modifying the pIGF1  
458 vector, and used to ectopically express GFP-tagged Nup58 and Pom121 as C-terminal  
459 GFP-tagged proteins: the cDNAs of these Nups were cloned into the pIGF1C vector  
460 using the *Xho*I and *Kpn*I sites. To endogenously express Nups tagged with a fluorescent  
461 protein at the C-termini of the macronuclear ORFs, MicNup214, Nup160, and Nup133  
462 were tagged with GFP using a pEGFP-neo4 vector (Mochizuki, 2008) (a kind gift from  
463 Dr. K. Mochizuki, IMBA), MicNup153 was tagged with mNeon using a  
464 p2xmNeon\_6xmyc\_Neo4 vector (a kind gift from Dr. Turkewitz, Univ. of Chicago), and

465 Seh1 was tagged with mCherry using a pmCherry-pur4 vector (Iwamoto et al., 2014).

466 Primers used in this study are listed in Table S7.

467

#### 468 **Expression of GFP–Nups in *Tetrahymena* cells**

469 Conjugating cells were subjected to transfection by electroporation using a Gene Pulser II  
470 (Bio-Rad, Hercules, CA) as described previously (Iwamoto et al., 2014; 2015). The  
471 resulting cell suspension was cultivated for 18 h and then treated with selection drugs,  
472 paromomycin sulfate (Sigma-Aldrich, St. Louis, MO) at 120 µg/ml when using pIGF1,  
473 pIGF1C, pEGFP-neo4, and p2xmNeon\_6xmyc\_Neo4 vectors, or puromycin  
474 dihydrochloride (Fermentek, Jerusalem, Israel) at 200 µg/ml when using a  
475 pmCherry-pur4 vector. Cadmium chloride was also added at 0.5 µg/ml to induce the  
476 expression of drug resistant genes for pEGFP-neo4, p2xmNeon\_6xmyc\_Neo4, and  
477 pmCherry-pur4 vectors. Resistant cells usually appeared within a few days after the drug  
478 was added. We checked that at least 5 independent clones (*i.e.*, grown in 5 different wells)  
479 exhibited the same intracellular localization of each GFP–Nup.

480

#### 481 **Immunoprecipitation**

482 For immunoprecipitation, GFP–Nup-expressing cells in logarithmic growth were  
483 pretreated with 0.5 mM PMSF for 30 min at 30°C and then collected by centrifugation.  
484 The cells were resuspended at  $2.5 \times 10^6$  cells/ml in homogenization buffer composed of  
485 150 mM NaCl, 1% Triton X-100, 2 mM PMSF, and Complete Protease Inhibitor Cocktail  
486 (Roche Diagnostics, Mannheim, Germany), and then homogenized with sonication on ice.  
487 The supernatant obtained after centrifugation at 10,000×g for 15 min was pretreated with  
488 Protein A Sepharose to absorb non-specifically bound proteins. After removal of the  
489 beads by low-speed centrifugation, the supernatant was incubated with 50 µg anti-GFP  
490 rabbit polyclonal antibody (#600-401-215, Rockland Immunochemicals, Limerick, PA)  
491 for 2 h at 4°C. To collect immunoprecipitated target proteins of interest, fresh Protein A  
492 Sepharose was added, incubated for another 2 h at 4°C, and then collected by  
493 centrifugation. After brief washing with homogenization buffer, the Sepharose beads  
494 were incubated with NuPAGE sample buffer (Thermo Fisher Scientific, Waltham, MA)  
495 to elute bound proteins. The proteins were separated by SDS-PAGE.

496

### 497 **Mass-spectrometry analysis**

498 The gel sample lane was cut into several pieces, and each treated with trypsin. The  
499 trypsinized peptide sample was subjected to liquid chromatography/tandem mass  
500 spectrometry (LC/MS/MS) using the LXQ linear ion trap (Thermo Finnigan, San Jose,  
501 CA) equipped with a Magic2002 and nanospray electrospray ionization device (Michrom  
502 BioResources, Auburn, CA and AMR, Tokyo, Japan), as described previously (Obuse et  
503 al., 2004). The LC-MS/MS data were searched by Mascot (Matrix Science, London, UK)  
504 with a non-redundant *T. thermophila* specific database (25,131 sequences) constructed  
505 from the nr NCBI database. The resulting files were loaded into Scaffold software  
506 (Proteome Software, Portland, OR) for comparing identified proteins between samples.

507

### 508 **Microscopic observation**

509 Intracellular localizations of GFP-tagged Nups were observed by fluorescence  
510 microscopy (IX-70; Olympus, Tokyo, Japan). Images were taken using the DeltaVision  
511 microscope system (GE Healthcare, Issaquah, WA) with oil-immersion objective lens  
512 UApo40 (NA=1.35) (Olympus). Line profiles of fluorescence intensity were obtained  
513 using a measurement tool included in the DeltaVision system. Background fluorescence  
514 measured cytoplasm as an averaged value of 5×5 pixels was subtracted from the peak  
515 values of fluorescence on the NE.

516

### 517 **Indirect Immunofluorescence staining**

518 *Tetrahymena* cells expressing GFP-tagged Nups were first fixed with cold methanol for  
519 20 min, and then additionally fixed with 4% formaldehyde in PBS for 20 min. After  
520 treated with 1% bovine serum albumin (BSA), cells were treated with 5 µg/ml anti-GLFG  
521 monoclonal antibody 21A10 for 2-3 hrs (Iwamoto et al., 2013). After washing with PBS,  
522 cells were treated with Alexa Fluor 594-conjugated goat anti-mouse IgG at 1/1000  
523 dilution for 1 h (Thermo Fisher Scientific). Images of forty z-sections with a 0.2-µm  
524 interval were taken for cells using the DeltaVision microscope system with  
525 oil-immersion objective lens PlanApoN60OSC (NA=1.4) (Olympus), and were  
526 processed by deconvolution using SoftWoRx software equipped with the microscope.

527

528 **Immuno-electron microscopy**

529 *Tetrahymena* cells expressing GFP-tagged Nups were fixed with 4% formaldehyde for 30  
530 min. After washing 3 times with PBS, they were permeabilized with 0.1% saponin for 15  
531 min at room temperature. After treatment with 1% BSA, cells were incubated with  
532 anti-GFP polyclonal antibody (Rockland Immunochemicals) at 1/200 dilution for 2 hrs,  
533 washed three times with PBS, then incubated with FluoroNanogold-anti rabbit Fab'  
534 Alexa Fluor 594 (Nanoprobes, Yaphank, NY) at 1/400 dilution for 1 h. The  
535 immunolabelled cells were fixed with 2.5% (w/v) glutaraldehyde (Nacalai tesque, Kyoto,  
536 Japan) for 1 h. After washing with 50 mM HEPES (pH 5.8) they were incubated with  
537 silver enhancement reagent (Tange et al., 2016) for 7 min. The reaction was stopped by  
538 washing three times with distilled water. Then the cells were post-fixed with 1% OsO<sub>4</sub> for  
539 15 min, electron stained with 2% uranyl acetate for 1 h, dehydrated with sequentially  
540 increased concentrations of ethanol, and embedded in epoxy resin (Epon812). The  
541 ultrathin sections sliced from the resin block were stained with 4% uranyl acetate for 15  
542 min and lead citrate (Sigma-Aldrich) for 1 min, and observed by a transmission electron  
543 microscope JEM-1400 (JEOL, Tokyo, Japan) with an acceleration voltage of 80 kV.

544 **Acknowledgements**

545 We thank *Tetrahymena* Stock Center at Cornell University, *Tetrahymena* Functional  
546 Genomics Database, *Tetrahymena* Genome Database Wiki, Drs. K. Mochizuki and A.P.  
547 Turkewitz for providing materials or valuable information. We thank S. Shibata and N.  
548 Shirai for technical assistance of LC-MS/MS analysis. We also thank Drs. D.B.  
549 Alexander, H. Asakawa, A.P. Turkewitz, S.O. Obado and M.P. Rout for critical reading  
550 of this paper.

551

552 **Competing interests**

553 No competing interests declared.

554

555 **Author contributions**

556 MI, HO, CM, YF, and KN performed the experiments. MI, KN, CO, YH and TH  
557 designed the experiments. All authors examined and discussed the data, and MI, CO, YH,  
558 and TH wrote the manuscript.

559

560 **Funding**

561 This work was supported by grants from the Japan Science and Technology Agency to  
562 TH and Japan Society for the Promotion of Science Kakenhi Grant Numbers JP24570227,  
563 JP15K07066 to MI, JP15H01462 to KN, JP20114006, JP25116004 to CO, JP26116511,  
564 JP16H01309, JP26251037 to YH, and JP23114724, JP26291007, JP25116006 to TH.

565 **References**

- 566 **Alber, F., Dokudovskaya, S., Veenhoff, L. M., Zhang, W., Kipper, J., Devos, D.,**  
567 **Suprpto, A., Karni-Schmidt, O., Williams, R., Chait, B. T. et al.** (2007). The  
568 molecular architecture of the nuclear pore complex. *Nature* **450**, 695-701.
- 569 **Allen, N. P., Huang, L., Burlingame, A. and Rexach, M.** (2001). Proteomic analysis of  
570 nucleoporin interacting proteins. *J. Biol. Chem.* **276**, 29268-29274.
- 571 **Amlacher, S., Sarges, P., Flemming, D., van Noort, V., Kunze, R., Devos, D. P.,**  
572 **Arumugam, M., Bork, P. and Hurt, E.** (2011). Insight into structure and assembly of  
573 the nuclear pore complex by utilizing the genome of a eukaryotic thermophile. *Cell*  
574 **146**, 277-289.
- 575 **Andersen, K. R., Onischenko, E., Tang, J. H., Kumar, P., Chen, J. Z., Ulrich, A.,**  
576 **Liphardt, J. T., Weis, K. and Schwartz, T. U.** (2013). Scaffold nucleoporins Nup188  
577 and Nup192 share structural and functional properties with nuclear transport receptors.  
578 *Elife* **2**, e00745.
- 579 **Asakawa, H., Yang, H.-J., Yamamoto, T. G., Ohtsuki, C., Chikashige, Y.,**  
580 **Sakata-Sogawa, K., Tokunaga, M., Iwamoto, M., Hiraoka, Y. and Haraguchi, T.**  
581 (2014). Characterization of nuclear pore complex components in fission yeast  
582 *Schizosaccharomyces pombe*. *Nucleus* **5**, 149-162.
- 583 **Berke, I. C., Boehmer, T., Blobel, G. and Schwartz, T. U.** (2004). Structural and  
584 functional analysis of Nup133 domains reveals modular building blocks of the nuclear  
585 pore complex. *J. Cell Biol.* **167**, 591-597.
- 586 **Bilokapic, S. and Schwartz, T. U.** (2012). Molecular basis for Nup37 and ELY5/ELYS  
587 recruitment to the nuclear pore complex. *Proc. Natl. Acad. Sci. USA* **109**,  
588 15241-15246.
- 589 **Brohawn, S. G., Leksa, N. C., Spear, E. D., Rajashankar, K. R. and Schwartz, T. U.**  
590 (2008). Structural evidence for common ancestry of the nuclear pore complex and  
591 vesicle coats. *Science* **322**, 1369-1373.
- 592 **Bui, K. H., von Appen, A., DiGuilio, A. L., Ori, A., Sparks, L., Mackmull, M. T.,**  
593 **Bock, T., Hagen, W., Andrés-Pons, A., Glavy, J. S. et al.** (2013). Integrated  
594 structural analysis of the human nuclear pore complex scaffold. *Cell* **155**, 1233-1243.

- 595 **Chug, H., Trakhanov, S., Hülsmann, B. B., Pleiner, T. and Görlich, D.** (2015).  
596 Crystal structure of the metazoan Nup62•Nup58•Nup54 nucleoporin complex. *Science*  
597 **350**, 106-110.
- 598 **Cordes, V. C., Reidenbach, S., Rackwitz, H. R. and Franke, W. W.** (1997).  
599 Identification of protein p270/Tpr as a constitutive component of the nuclear pore  
600 complex-attached intranuclear filaments. *J. Cell Biol.* **136**, 515-529.
- 601 **Cronshaw, J. M., Krutchinsky, A. N., Zhang, W., Chait, B. T. and Matunis, M. J.**  
602 (2002). Proteomic analysis of the mammalian nuclear pore complex. *J. Cell Biol.* **158**,  
603 915-927.
- 604 **DeGrasse, J. A., DuBois, K. N., Devos, D., Siegel, T. N., Sali, A., Field, M. C., Rout,**  
605 **M. P. and Chait, B. T.** (2009). Evidence for a shared nuclear pore complex  
606 architecture that is conserved from the last common eukaryotic ancestor. *Mol. Cell.*  
607 *Proteomics* **8**, 2119-2130.
- 608 **Devos, D., Dokudovskaya, S., Alber, F., Williams, R., Chait, B. T., Sali, A. and Rout,**  
609 **M. P.** (2004). Components of coated vesicles and nuclear pore complexes share a  
610 common molecular architecture. *PLOS Biol.* **2**, e380.
- 611 **Eisen, J. A., Coyne, R. S., Wu, M., Wu, D., Thiagarajan, M., Wortman, J. R.,**  
612 **Badger, J. H., Ren, Q., Amedeo, P., Jones, K. M. et al.** (2006). Macronuclear  
613 genome sequence of the ciliate *Tetrahymena thermophila*, a model eukaryote. *PLOS*  
614 *Biol.* **4**, e286.
- 615 **Enarson, P., Enarson, M., Bastos, R. and Burke, B.** (1998). Amino-terminal  
616 sequences that direct nucleoporin nup153 to the inner surface of the nuclear envelope.  
617 *Chromosoma* **107**, 228-236.
- 618 **Fornerod, M., van Deursen, J., van Baal, S., Reynolds, A., Davis, D., Murti, K. G.,**  
619 **Fransen, J. and Grosveld, G.** (1997). The human homologue of yeast CRM1 is in a  
620 dynamic subcomplex with CAN/Nup214 and a novel nuclear pore component Nup88.  
621 *EMBO J.* **16**, 807-816.
- 622 **Funakoshi, T., Clever, M., Watanebe, A. and Imamoto, N.** (2011). Localization of  
623 Pom121 to the inner nuclear membrane is required for an early step of interphase  
624 nuclear pore complex assembly. *Mol. Biol. Cell* **22**, 1058-1069.
- 625 **Goldfarb, D. S. and Gorovsky, M. A.** (2009). Nuclear dimorphism: two peas in a pod.  
626 *Curr. Biol.* **19**, R449-R452.



- 627 **Gorlich, D. and Mattaj, I. W.** (1996). Nucleocytoplasmic transport. *Science* **271**,  
628 1513-1518.
- 629 **Grandi, P., Dang, T., Pané, N., Shevchenko, A., Mann, M., Forbes, D. and Hurt, E.**  
630 (1997). Nup93, a vertebrate homologue of yeast Nic96p, forms a complex with a novel  
631 205-kDa protein and is required for correct nuclear pore assembly. *Mol. Biol. Cell* **8**,  
632 2017-2038.
- 633 **Grandi, P., Doye, V. and Hurt, E. C.** (1993). Purification of NSP1 reveals complex  
634 formation with “GLFG” nucleoporins and a novel nuclear pore protein NIC96. *EMBO*  
635 *J.* **12**, 3061-3071.
- 636 **Greber, U. F., Senior, A. and Gerace, L.** (1990). A major glycoprotein of the nuclear  
637 pore complex is a membrane-spanning polypeptide with a large luminal domain and a  
638 small cytoplasmic tail. *EMBO J.* **9**, 1495-1502.
- 639 **Griffis, E. R., Xu, S. and Powers, M. A.** (2003). Nup98 localizes to both nuclear and  
640 cytoplasmic sides of the nuclear pore and binds to two distinct nucleoporin  
641 subcomplexes. *Mol. Biol. Cell* **14**, 600-610.
- 642 **Hallberg, E., Wozniak, R. W. and Blobel, G.** (1993). An integral membrane protein of  
643 the pore membrane domain of the nuclear envelope contains a nucleoporin-like region.  
644 *J. Cell Biol.* **122**, 513-521.
- 645 **Hawryluk-Gara, L. A., Shibuya, E. K. and Wozniak, R. W.** (2005). Vertebrate Nup53  
646 interacts with the nuclear lamina and is required for the assembly of a  
647 Nup93-containing complex. *Mol. Biol. Cell* **16**, 2382-2394.
- 648 **Hodel, A. E., Hodel, M. R., Griffis, E. R., Hennig, K. A., Ratner, G. A., Xu, S. and**  
649 **Powers, M. A.** (2002). The three-dimensional structure of the autoproteolytic, nuclear  
650 pore-targeting domain of the human nucleoporin Nup98. *Mol. Cell* **10**, 347-358.
- 651 **Isgro, T. A. and Schulten, K.** (2005). Binding dynamics of isolated nucleoporin repeat  
652 regions to importin- $\beta$ . *Structure* **13**, 1869-1879.
- 653 **Iwamoto, M., Asakawa, H., Hiraoka, Y. and Haraguchi, T.** (2010). Nucleoporin  
654 Nup98: a gatekeeper in the eukaryotic kingdoms. *Genes Cells* **15**, 661-669.
- 655 **Iwamoto, M., Asakawa, H., Ohtsuki, C., Osakada, H., Koujin, T., Hiraoka, Y. and**  
656 **Haraguchi, T.** (2013). Monoclonal antibodies recognize Gly-Leu-Phe-Gly repeat of  
657 nucleoporin Nup98 of *Tetrahymena*, yeasts, and humans. *Monoclon. Antib.*  
658 *Immunodiagn. Immunother.* **32**, 81-90.

- 659 **Iwamoto, M., Koujin, T., Osakada, H., Mori, C., Kojidani, T., Matsuda, A.,**  
660 **Asakawa, H., Hiraoka, Y. and Haraguchi, T.** (2015). Biased assembly of the nuclear  
661 pore complex is required for somatic and germline nuclear differentiation in  
662 *Tetrahymena*. *J. Cell Sci.* **128**, 1812-1823.
- 663 **Iwamoto, M., Mori, C., Kojidani, T., Bunai, F., Hori, T., Fukagawa, T., Hiraoka, Y.**  
664 **and Haraguchi, T.** (2009). Two distinct repeat sequences of Nup98 nucleoporins  
665 characterize dual nuclei in the binucleated ciliate *Tetrahymena*. *Curr. Biol.* **19**,  
666 843-847.
- 667 **Iwamoto, M., Mori, C., Hiraoka, Y. and Haraguchi, T.** (2014). Puromycin resistance  
668 gene as an effective selection marker for ciliate *Tetrahymena*. *Gene* **534**, 249-255.
- 669 **Karrer, K. M.** (2012). Nuclear dualism. *Methods Cell Biol.* **109**, 29-52.
- 670 **Keminer, O. and Peters, R.** (1999). Permeability of single nuclear pores. *Biophys. J.* **77**,  
671 217-228.
- 672 **Kosova, B., Panté, N., Rollenhagen, C. and Hurt, E.** (1999). Nup192p is a conserved  
673 nucleoporin with a preferential location at the inner site of the nuclear membrane. *J.*  
674 *Biol. Chem.* **274**, 22646-22651.
- 675 **Liu, S. M. and Stewart, M.** (2005). Structural basis for the high-affinity binding of  
676 nucleoporin Nup1p to the *Saccharomyces cerevisiae* importin- $\beta$  homologue, Kap95p.  
677 *J. Mol. Biol.* **349**, 515-525.
- 678 **Lutzmann, M., Kunze, R., Buerer, A., Aebi, U. and Hurt, E.** (2002). Modular  
679 self-assembly of a Y-shaped multiprotein complex from seven nucleoporins. *EMBO J.*  
680 **21**, 387-397.
- 681 **Loiodice, I., Alves, A., Rabut, G., Van Overbeek, M., Ellenberg, J., Sibarita, J. B.**  
682 **and Doye, V.** (2004). The entire Nup107-160 complex, including three new members,  
683 is targeted as one entity to kinetochores in mitosis. *Mol. Biol. Cell* **15**, 3333-3344.
- 684 **Malone, C. D., Anderson, A. M., Motl, J. A., Rexer, C. H. and Chalker, D. L.** (2005).  
685 Germ line transcripts are processed by a Dicer-like protein that is essential for  
686 developmentally programmed genome rearrangements of *Tetrahymena thermophila*.  
687 *Mol. Cell. Biol.* **25**, 9151-9164.
- 688 **Malone, C. D., Falkowska, K. A., Li, A. Y., Galanti, S. E., Kanuru, R. C., LaMont, E.**  
689 **G., Mazarella, K. C., Micev, A. J., Osman, M. M., Piotrowski, N. K. et al.** (2008).  
690 Nucleus-specific importin alpha proteins and nucleoporins regulate protein import and

- 691 nuclear division in the binucleate *Tetrahymena thermophila*. *Eukaryot. Cell* **7**,  
692 1487-1499.
- 693 **Miao, M., Ryan, K. J. and Wentz, S. R.** (2006). The integral membrane protein  
694 Pom34p functionally links nucleoporin subcomplexes. *Genetics* **172**, 1441-1457.
- 695 **Miao, W., Xiong, J., Bowen, J., Wang, W., Liu, Y., Braguinets, O., Grigull, J.,  
696 Pearlman, R. E., Orias, E. and Gorovsky, M. A.** (2009). Microarray analysis of gene  
697 expression during the *Tetrahymena thermophila* life cycle. *PLOS ONE* **4**, e4429.
- 698 **Mishra, R. K., Chakraborty, P., Arnaoutov, A., Fontoura, B. M. and Dasso, M.**  
699 (2010). The Nup107-160 complex and  $\gamma$ -TuRC regulate microtubule polymerization at  
700 kinetochores. *Nat. Cell Biol.* **12**, 164-169.
- 701 **Mitchell, J. M., Mansfeld, J., Capitanio, J., Kutay, U. and Wozniak, R. W.** (2010).  
702 Pom121 links two essential subcomplexes of the nuclear pore complex core to the  
703 membrane. *J. Cell Biol.* **191**, 505-521.
- 704 **Mochizuki, K.** (2008). High efficiency transformation of *Tetrahymena* using a  
705 codon-optimized neomycin resistance gene. *Gene* **425**, 79-83.
- 706 **Napetschnig, J., Blobel, G. and Hoelz, A.** (2007). Crystal structure of the N-terminal  
707 domain of the human protooncogene Nup214/CAN. *Proc. Natl. Acad. Sci. USA* **104**,  
708 1783-1788.
- 709 **Obado, S. O., Brillantes, M., Uryu, K., Zhang, W., Ketaren, N. E., Chait, B. T., Field,  
710 M. C. and Rout, M. P.** (2016). Interactome mapping reveals the evolutionary history  
711 of the nuclear pore complex. *PLOS Biol.* **14**, e1002365.
- 712 **Obuse, C., Iwasaki, O., Kiyomitsu, T., Goshima, G., Toyoda, Y. and Yanagida, M.**  
713 (2004). A conserved Mis12 centromere complex is linked to heterochromatic HP1 and  
714 outer kinetochore protein Zwint-1. *Nat. Cell Biol.* **6**, 1135-1141.
- 715 **Orias, E.** (2000). Toward sequencing the *Tetrahymena* genome: exploiting the gift of  
716 nuclear dimorphism. *J. Eukaryot. Microbiol.* **47**, 328-333.
- 717 **Orias, E., Cervantes, M. D. and Hamilton, E. P.** (2011). *Tetrahymena thermophila*, a  
718 unicellular eukaryote with separate germline and somatic genomes. *Res. Microbiol.*  
719 **162**, 578-586.
- 720 **Orjalo, A. V., Arnaoutov, A., Shen, Z., Boyarchuk, Y., Zeitlin, S. G., Fontoura, B.,  
721 Briggs, S., Dasso, M. and Forbes, D. J.** (2006). The Nup107-160 nucleoporin

- 722 complex is required for correct bipolar spindle assembly. *Mol. Biol. Cell* **17**,  
723 3806-3818.
- 724 **Osmani, A. H., Davies, J., Liu, H. L., Nile, A. and Osmani, S. A.** (2006). Systematic  
725 deletion and mitotic localization of the nuclear pore complex proteins of *Aspergillus*  
726 *nidulans*. *Mol. Biol. Cell* **17**, 4946-4961.
- 727 **Paine, P. L., Moore, L. C. and Horowitz, S. B.** (1975). Nuclear envelope permeability.  
728 *Nature* **254**, 109-114.
- 729 **Rothballer, A. and Kutay, U.** (2012). SnapShot: the nuclear envelope II. *Cell* **150**, 1084.
- 730 **Rout, M. P., Aitchison, J. D., Suprpto, A., Hjertaas, K., Zhao, Y. and Chait, B. T.**  
731 (2000). The yeast nuclear pore complex: composition, architecture, and transport  
732 mechanism. *J. Cell Biol.* **148**, 635-651.
- 733 **Siniosoglou, S., Wimmer, C., Rieger, M., Doye, V., Tekotte, H., Weise, C., Emig, S.,**  
734 **Segref, A. and Hurt, E. C.** (1996). A novel complex of nucleoporins, which includes  
735 Sec13p and a Sec13p homolog, is essential for normal nuclear pores. *Cell* **84**, 265-275.
- 736 **Stavru, F., Hülsmann, B. B., Spang, A., Hartmann, E., Cordes, V. C. and Görlich, D.**  
737 (2006). NDC1: a crucial membrane-integral nucleoporin of metazoan nuclear pore  
738 complexes. *J. Cell Biol.* **173**, 509-519.
- 739 **Stover, N. A., Punia, R. S., Bowen, M. S., Dolins, S. B. and Clark, T. G.** (2012).  
740 *Tetrahymena* genome database Wiki: a community-maintained model organism  
741 database. *Database* **2012**, bas007.
- 742 **Strambio-de-Castillia, C., Blobel, G. and Rout, M. P.** (1999). Proteins connecting the  
743 nuclear pore complex with the nuclear interior. *J. Cell Biol.* **144**, 839-855.
- 744 **Sugai, T. and Hiwatashi, K.** (1974). Cytologic and autoradiographic studies of the  
745 micronucleus at meiotic prophase in *Tetrahymena pyriformis*. *J Protozool.* **21**,  
746 542-548.
- 747 **Tamura, K., Fukao, Y., Iwamoto, M., Haraguchi, T. and Hara-Nishimura, I.** (2010).  
748 Identification and characterization of nuclear pore complex components in  
749 *Arabidopsis thaliana*. *Plant Cell* **22**, 4084-4097.
- 750 **Tange, Y., Chikashige, Y., Takahata, S., Kawakami, K., Higashi, M., Mori, C.,**  
751 **Kojidani, T., Hirano, Y., Asakawa, H., Murakami, Y. et al.** (2016). Inner nuclear  
752 membrane protein Lem2 augments heterochromatin formation in response to  
753 nutritional conditions. *Genes Cells* **21**, 812-832.

- 754 **Terry, L. J. and Wentz, S. R.** (2009). Flexible gates: dynamic topologies and functions  
755 for FG nucleoporins in nucleocytoplasmic transport. *Eukaryot. Cell* **8**, 1814-1827.
- 756 **Tetenbaum-Novatt, J., Hough, L. E., Mironska, R., McKenney, A. S. and Rout, M.**  
757 **P.** (2012). Nucleocytoplasmic transport: a role for nonspecific competition in  
758 karyopherin-nucleoporin interactions. *Mol. Cell. Proteomics* **11**, 31-46.
- 759 **Vollmer, B. and Antonin, W.** (2014). The diverse roles of the Nup93/Nic96 complex  
760 proteins - structural scaffolds of the nuclear pore complex with additional cellular  
761 functions. *Biol. Chem.* **395**, 515-528.
- 762 **Weirich, C. S., Erzberger, J. P., Berger, J. M. and Weis, K.** (2004). The N-terminal  
763 domain of Nup159 forms a  $\beta$ -propeller that functions in mRNA export by tethering the  
764 helicase Dbp5 to the nuclear pore. *Mol. Cell* **16**, 749-760.
- 765 **Winey, M., Hoyt, M. A., Chan, C., Goetsch, L., Botstein, D. and Byers, B.** (1993).  
766 *NDC1*: a nuclear periphery component required for yeast spindle pole body duplication.  
767 *J. Cell Biol.* **122**, 743-751.
- 768 **Wozniak, R. W., Blobel, G. and Rout, M. P.** (1994). POM152 is an integral protein of  
769 the pore membrane domain of the yeast nuclear envelope. *J. Cell Biol.* **125**, 31-42.
- 770 **Yavuz, S., Santarella-Mellwig, R., Koch, B., Jaedicke, A., Mattaj, I. W. and Antonin,**  
771 **W.** (2010). NLS-mediated NPC functions of the nucleoporin Pom121. *FEBS Lett.*  
772 **584**, 3292-3298.

773 **Figure legends**

774 **Fig. 1. Immunoprecipitation and mass spectrometry analysis to identify Nup93**  
775 **complex members.** (A) A *T. thermophila* cell fixed with methanol and stained with  
776 DAPI. Bar, 20  $\mu$ m. (B) The position of the Nup93 complex within the NPC architecture.  
777 See also Fig. S1. (C) Simplified procedure of immunoprecipitation and mass  
778 spectrometry for GFP-*Tt*Nup93-expressing cells used for immunoprecipitation. (D)  
779 Mass spectrometric identification of the proteins co-precipitated with GFP-*Tt*Nup93.  
780 The top seven proteins are listed among other identified proteins (Table S2). (E) Physical  
781 interaction map of Nup93 based on the mass spectrometry results.

782

783 **Fig. 2. Distributions of secondary structures and conserved domains in *Tetrahymena***  
784 **nucleoporins.** Each Nup is shown as the protein name on the left. Blue, red, and black  
785 letters mean MIC-specific, MAC-specific, and shared components, respectively.  
786 Asterisks on the left shoulder of the protein names indicate Nups newly identified in this  
787 study. The colored components in the illustration are as follows: orange boxes/bars,  
788  $\alpha$ -helix; green boxes/bars,  $\beta$ -strand; red slanting lines, FG repeats; blue slanting lines, FX  
789 repeats (X means any residue, but the majority are N and Q); and purple ellipse, predicted  
790 TM domain. Conserved domains are indicated by differently colored bars with standard  
791 domain names.

792

793 **Fig. 3. Y-complex components localize to both nuclei but are biased to MICs.** (A)  
794 The position of the Y-complex within the NPC architecture. (B) Fluorescent micrographs  
795 of GFP-Nups ectopically expressed in *Tetrahymena* cells. White broken lines represent  
796 the borders of cells. The inset in each panel shows a deconvoluted image focused on the  
797 MAC surface. Arrows indicate the position of the MIC. Bars, 20  $\mu$ m. A line profile of  
798 fluorescence intensity along the thin green broken line is presented under each image  
799 panel. Blue and red arrowheads indicate the points corresponding to MIC and MAC  
800 envelopes, respectively. An asterisk marks the point at which the borders of the two  
801 nuclei overlap, and where the intensity is measured as the sum of both NEs. Below the  
802 line profile, the fluorescence intensities of MAC and MIC NEs from 50 cells are plotted.  
803 The vertical axis of the graph is shown in arbitrary units. Broken lines connect the plots of  
804 MAC and MIC within the same cell. Average values are presented by red and blue bars

805 for MAC and MIC, respectively. The numbers upon the MIC plots indicate fold increase  
806 of fluorescence in MIC from MAC. All differences are significant ( $P < 10^{-20}$  by Student's  
807 *t*-test). (C) Expression profiles of the Y-complex members extracted from the TetraFGD  
808 (<http://tfgd.ihb.ac.cn/>). Plots are the average of two values presented in the database. The  
809 horizontal axis represents successive stages of culture growth and therefore different  
810 physiological conditions. For the logarithmic growth stage, L-l, L-m, and L-h represent  
811 low, medium, and high cell concentrations, respectively. For starvation and conjugation  
812 stages, numbers represent hours after the transfer of the cells to each condition. The  
813 vertical axis represents relative values of mRNA expression. For details, visit the  
814 database website. (D) A simple representation of the deduced composition of MAC and  
815 MIC NPCs with different numbers of Y-complexes.

816

817 **Fig. 4. Newly identified FG-Nups of *Tetrahymena*.** (A) MIC-specific paralogs of  
818 Nup214 and Nup153. The upper figure indicates the predicted positions of these Nups  
819 within the MIC NPC. Fluorescence micrographs show the subcellular localization of  
820 fluorescent protein-tagged Nups; MicNup214 and MicNup153 were endogenously  
821 tagged with GFP and mNeon at the C-termini of their ORFs, respectively. Arrows  
822 indicate the position of the MIC. Other fluorescent bodies dispersed in the cytoplasm are  
823 phagosomes taking in materials derived from the culture medium. (B) MAC-specific  
824 paralogs of Nup214 and Nup153. The upper figure indicates the predicted positions of  
825 these Nups within the MAC NPC. Fluorescence micrographs show the subcellular  
826 localizations of ectopically expressed GFP-Nups. The left panels show a whole cell, and  
827 each nuclear region is enlarged in the right panels. White broken lines represent the  
828 borders of cells. Insets in the left panels show deconvoluted images focused on the MAC  
829 surface. Arrows indicate the position of MICs. Bars indicate 20  $\mu\text{m}$  for the left panels and  
830 5  $\mu\text{m}$  for the right panels. (C) *Tt*Nup62 and *Tt*Nup58 localized in both nuclei. The upper  
831 illustration indicates the predicted position of these Nups, which constitute the Nup62  
832 complex. Fluorescent micrographs show the subcellular localizations of ectopically  
833 expressed GFP-*Tt*Nup62 and *Tt*Nup58-GFP. Bars, 20  $\mu\text{m}$ . Line profiles and plots of  
834 fluorescence intensity are shown under each image panel in the same manner as in Fig.  
835 3B. Both differences are significant ( $P < 10^{-16}$  by Student's *t*-test). (D) Expression

836 profiles of FG-Nups, as in Fig. 3C.

837

838 **Fig. 5. Nuclear localization and expression profiles of Nup88, Nup185, and Tpr.** (A)  
839 Expression profiles. (B) The predicted positions of *Tt*Nup88 and *Tt*Tpr. The position of  
840 Nup185 is unknown. (C) The subcellular localization of ectopically expressed  
841 GFP-*Tt*Nup88. The left panel shows a whole cell, and its nuclear region is enlarged in the  
842 right panel. White broken lines represent the borders of cells. Inset in the left panel shows  
843 the deconvoluted image focused on the MAC surface. Arrows indicate the position of the  
844 MICs. Bars indicate 20  $\mu\text{m}$  for the left panel and 5  $\mu\text{m}$  for the right panel. A line profile  
845 and plots of fluorescence intensity are shown under each image panel, as in Fig. 3B. The  
846 fluorescence intensity of the MIC NE is significantly lower than that of the MAC NE ( $P <$   
847  $10^{-39}$ ). (D) Subcellular localization of ectopically expressed GFP-Nup185. The  
848 fluorescence intensity of the MIC NE is significantly lower than that of the MAC NE ( $P <$   
849  $10^{-30}$ ). (E) Subcellular localization of ectopically expressed GFP-*Tt*Tpr. The  
850 fluorescence intensity of the MIC NE is slightly lower than that of the MAC NE ( $P =$   
851 0.0024, by Student's *t*-test).

852

853 **Fig. 6. Two novel pore membrane proteins show nuclear specificity.** (A) Illustration  
854 of molecular profiles. The frequency and positions of FG repeats are compared between *T.*  
855 *thermophila* Pom proteins and human POM121C (accession: A8CG34). Red and blue  
856 slanting lines represent FG and FX (X means any amino acid residue, but the majority are  
857 N, Q, and S), respectively. Orange and green boxes represent  $\alpha$ -helices and  $\beta$ -strands,  
858 respectively. Purple ellipses represent predicted TM domains. (B) The expression profiles  
859 of nucleus-specific Pom-s and shared *Tt*gp210, as in Fig. 3C. (C) Fluorescence  
860 micrographs show ectopically expressed GFP-tagged *Tt*Pom121. Left panels show whole  
861 cells, and the right panels show enlarged images of the nuclear regions. White broken  
862 lines represent the borders of cells. Arrows indicate the position of MICs. Bars indicate  
863 20  $\mu\text{m}$  for the left panels and 5  $\mu\text{m}$  for the right panels. (D) Fluorescence micrographs  
864 show GFP-tagged Pom82 (full length, 1–699 aa) and GFP-Pom82 $\Delta$ TM (transmembrane  
865 domain-deletion mutant, 1–678 aa) both ectopically expressed. Arrows indicate the  
866 position of the MICs. Other fluorescent bodies dispersed in the cytoplasm are



867 phagosomes taking in materials derived from the culture medium. (E, F) iEM for  
868 Pom121-GFP localizing to the MAC NPC (E) and GFP-Pom82 localizing to the MIC  
869 NPC (F) using anti-GFP antibody. (a) Immuno-electron micrographs for a single NPC.  
870 Dark dots represent signals of gold particles. Bars, 100 nm. (b) Images present a  
871 projection image of 20 immuno-electron micrographs of NPCs decorated with gold  
872 particles. (c) The positions of individual gold particles in (b) are plotted. Broken lines  
873 trace nuclear envelope, and upper and lower sides are cytoplasm and nucleoplasm,  
874 respectively. (G) The position of *Tt*Pom121 within the MAC NPC architecture. (H) The  
875 position of *Tt*Pom82 within the MIC NPC architecture.

876

877 **Fig. 7. Schematic models of MAC and MIC NPCs.** (A) Deduced composition of the  
878 MAC NPC. (B) Deduced composition of the MIC NPC. Boxes colored in red and blue  
879 represent MAC-specific and MIC-specific components, respectively: Pom121 (P121),  
880 Pom82 (P82), Nup98 paralogs (98), Nup214 (214), and Nup153 (153). Green boxes  
881 represent shared components including the nuclear basket structure Tpr and its associated  
882 Nup50 (50). *Tt*Nup50 is distributed mostly in the nucleoplasm in MACs, whereas it  
883 localizes to the NPC in MICs (Malone et al., 2008; Iwamoto et al., 2009). Yellow boxes  
884 are MIC-biased Y-complexes, and purple boxes are MAC-biased *Tt*Nup88 (88). The  
885 number of duplications of yellow and purple boxes does not reflect the actual quantity of  
886 those components *in vivo*. Homologs of Nup358 (358), hCG1 (CG), ALADIN (AL), and  
887 ELYS constituting the cytoplasmic structure, were not found in *T. thermophila*.

888

A

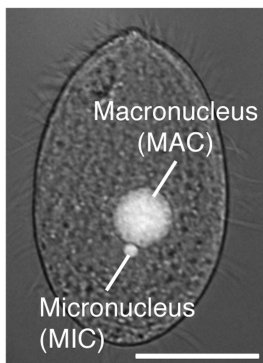

B

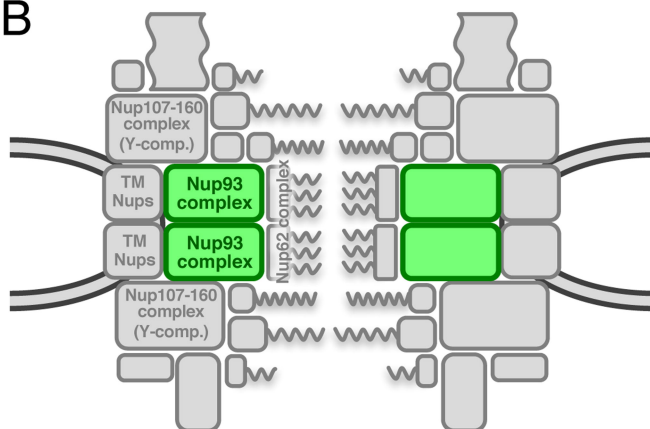

C

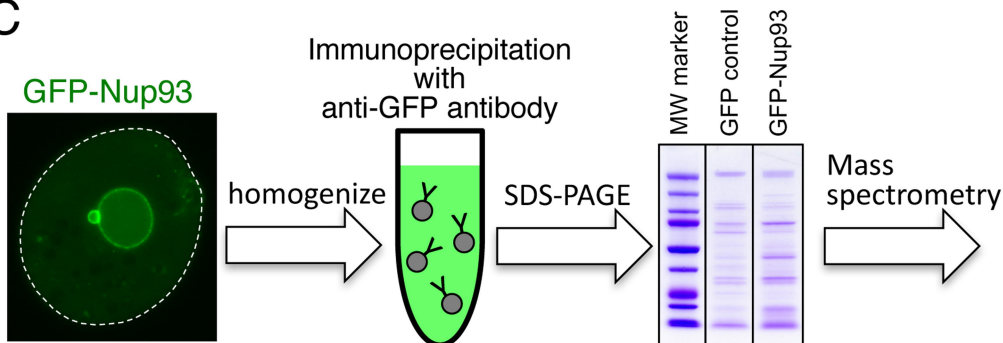

D

| # | Identified Proteins                                  | Gene ID         | Predicted MW | Number of assigned spectra |           |
|---|------------------------------------------------------|-----------------|--------------|----------------------------|-----------|
|   |                                                      |                 |              | GFP control                | GFP-Nup93 |
| 1 | <b>Nup308</b>                                        | TTHERM_00091620 | 308 kDa      | 0                          | 54        |
| 2 | <b>Nup93</b>                                         | TTHERM_00622800 | 113 kDa      | 0                          | 14        |
| 3 | $\alpha$ -tubulin, ATU1                              | TTHERM_00558620 | 50 kDa       | 0                          | 8         |
| 4 | <b>Nup58</b>                                         | TTHERM_00194800 | 45 kDa       | 0                          | 8         |
| 5 | Translation elongation factor EF-1, subunit $\alpha$ | TTHERM_00655820 | 48 kDa       | 0                          | 4         |
| 6 | Granule lattice, GRL2                                | TTHERM_00473020 | 48 kDa       | 0                          | 4         |
| 7 | ATP synthase $\beta$ chain, mitochondrial precursor  | TTHERM_00585260 | 53 kDa       | 0                          | 4         |

E

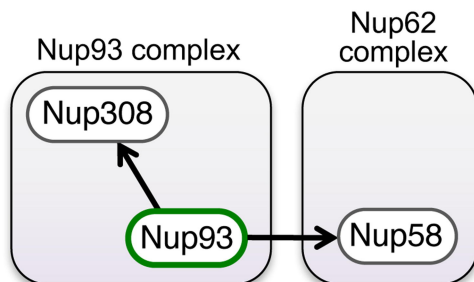

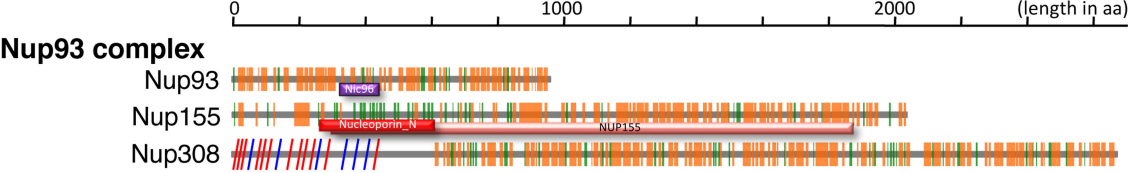

### Nup107-160 complex (Y-complex)

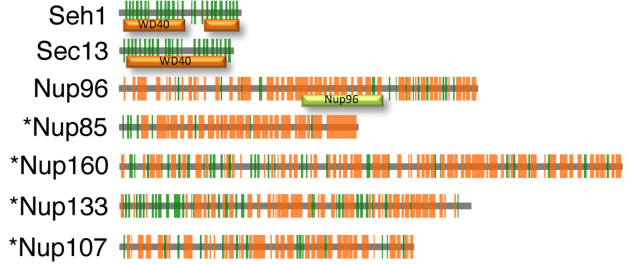

### Nucleus-specific FG Nups

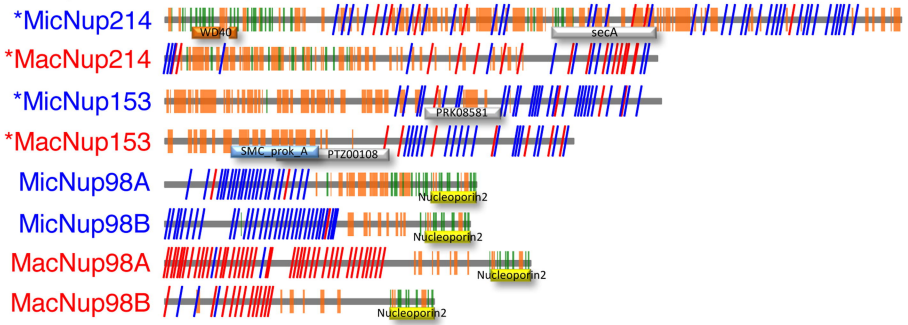

### Central channel FG-Nups (Nup62 complex)

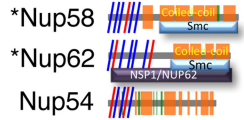

### Miscellaneous Nups

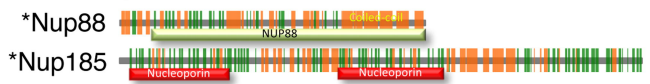

### Nuclear basket

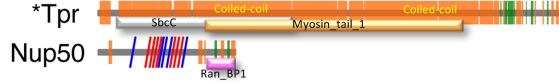

### Transmembrane

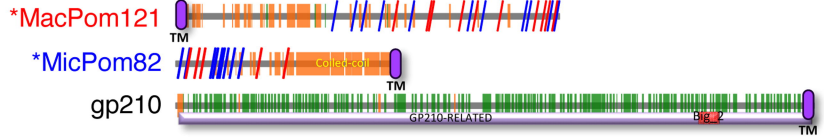

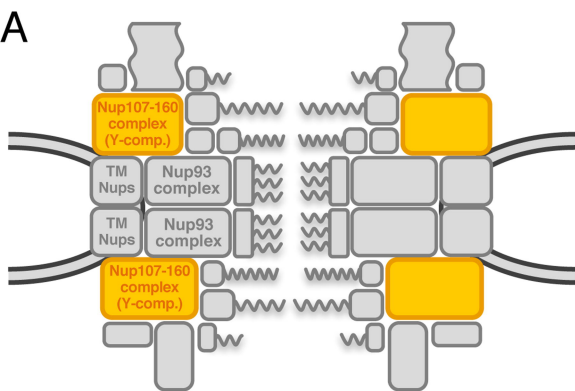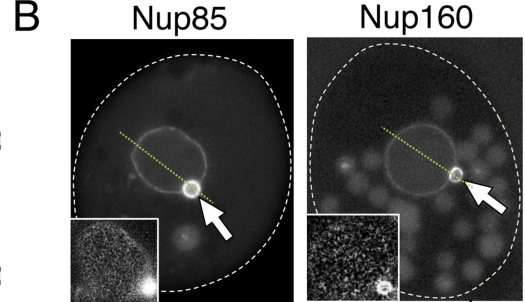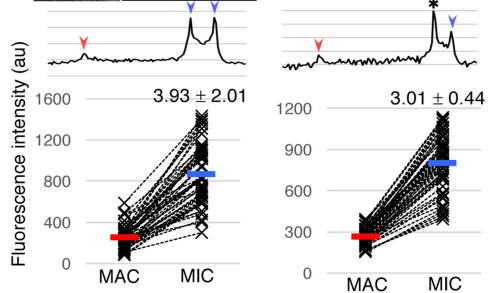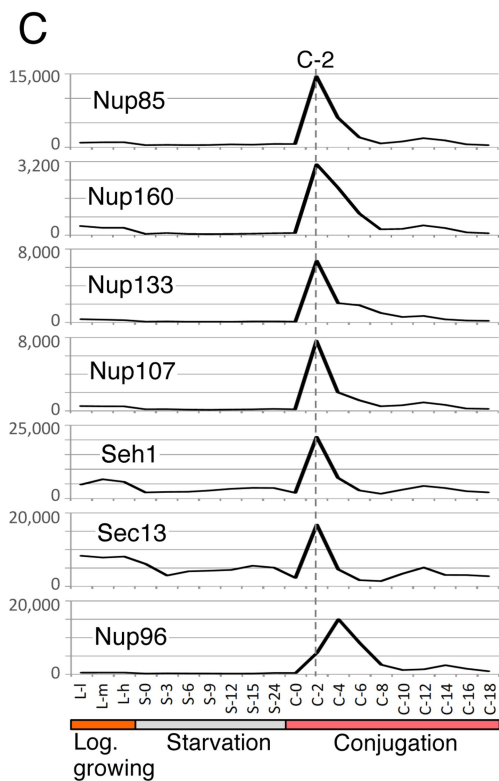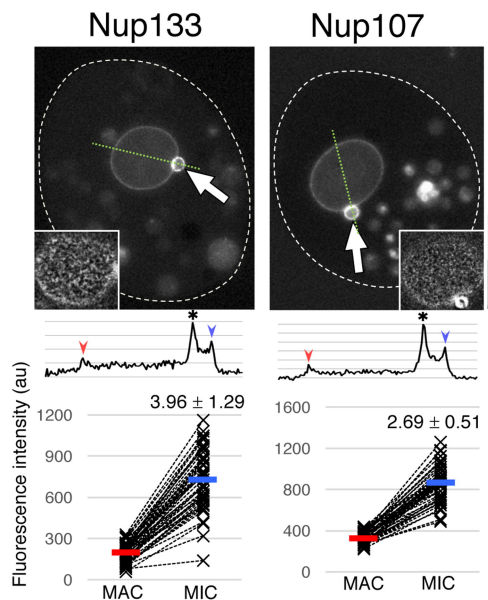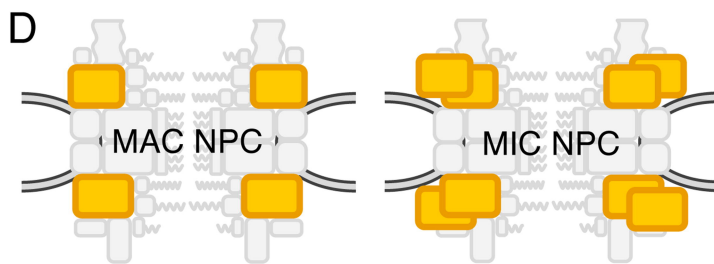



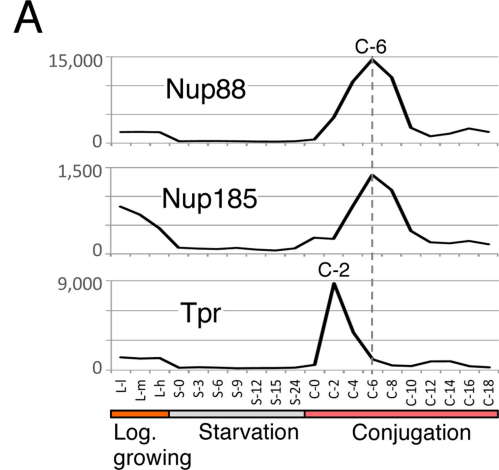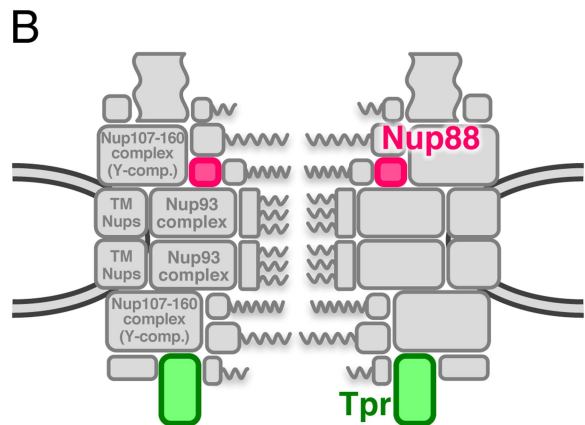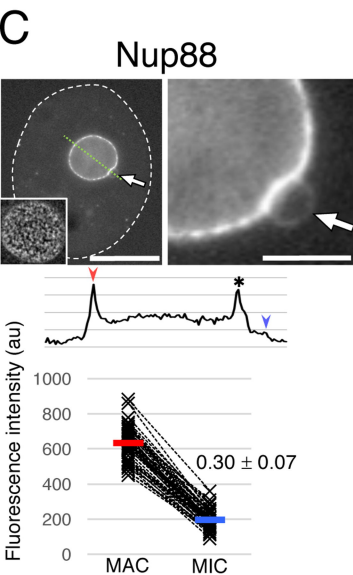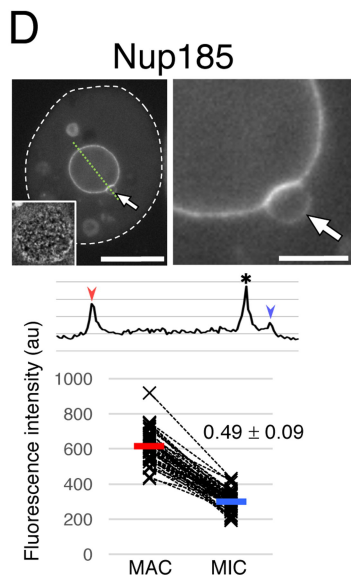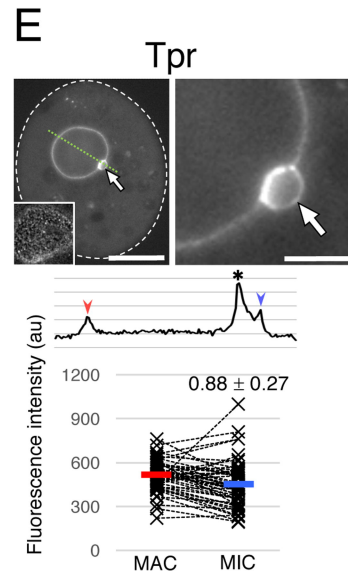

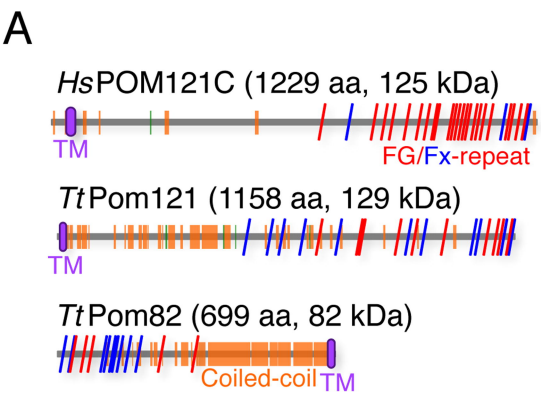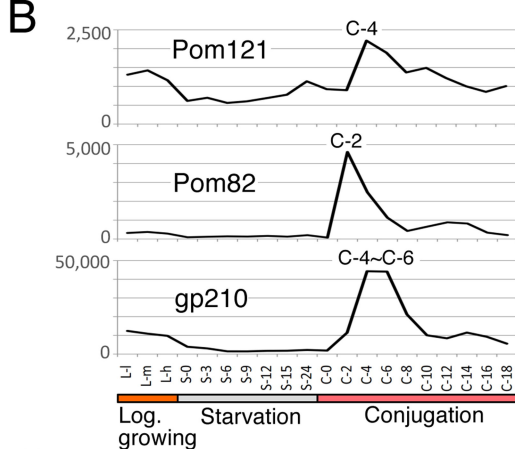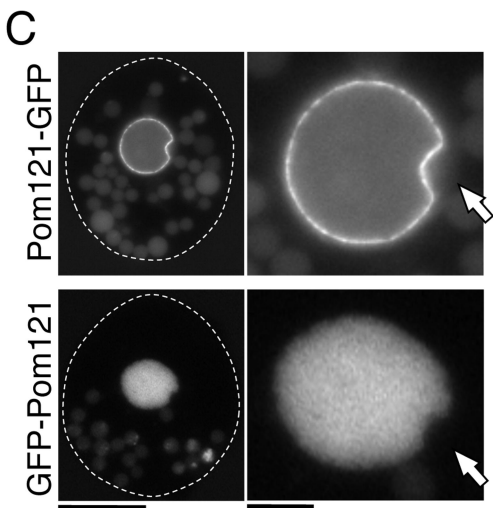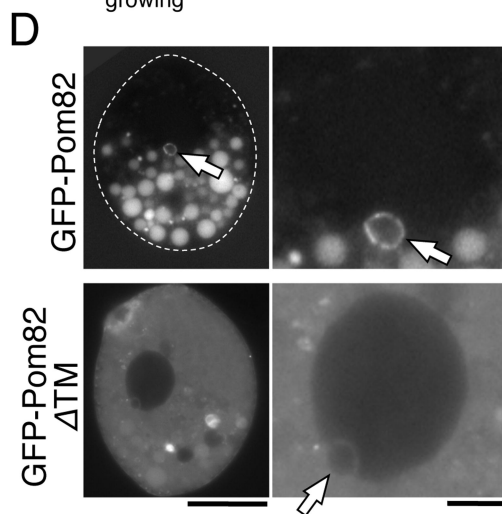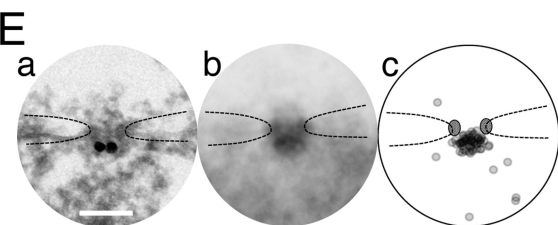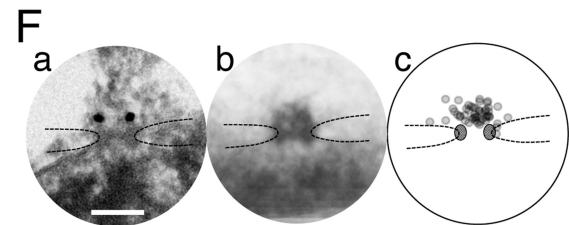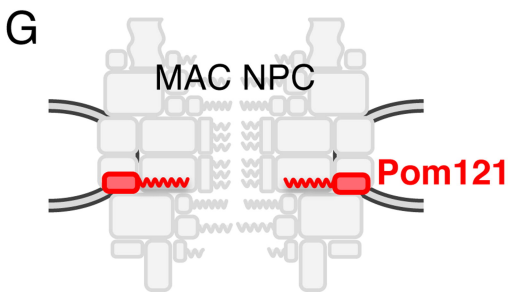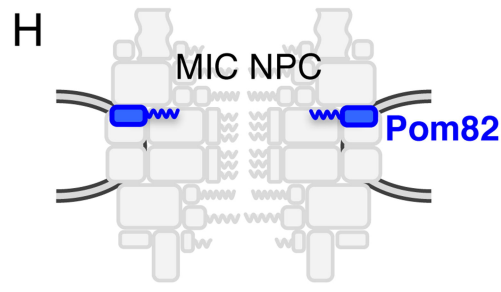

Source: http://biorxiv.org/content/10.1101/116277v1.full.pdf
